# Supplementary material for: One-step synthesis of magnetic iron–aluminum oxide/graphene oxide nanoparticles as a selective adsorbent for fluoride removal from aqueous solution
Source: Royal Society of Chemistry journal article supplement (doi:10.1039/c5ra23676b), 2016-01-01
Supplement: c5ra23676b1.pdf [file c5ra23676b1.pdf]

## Supplementary Information

### One-step synthesis of magnetic iron-aluminum oxide/graphene oxide nanoparticles as a selective adsorbent for fluoride removal from aqueous solution

Lei Liu,<sup>a</sup> Zhaojie Cui,<sup>\*a</sup> Qianchi Ma,<sup>a</sup> Wei Cui<sup>a</sup> and Xu Zhang<sup>a</sup>

a. School of Environmental Science and Engineering, Shandong University, 27 Shanda Nanlu, Ji'nan, 250100, China.

\* Corresponding author. E-mail: cuizj@sdu.edu.cn; Fax: +86 531 88361176; Tel: +86 531 88361176

Table S1-The composition ratio of raw materials to prepare different kinds of adsorbents

| GO<br>(g/500mL H <sub>2</sub> O) | FeCl <sub>3</sub> ·6H <sub>2</sub> O<br>(g) | FeCl <sub>2</sub> ·4H <sub>2</sub> O<br>(g) | AlCl <sub>3</sub> ·6H <sub>2</sub> O<br>(g) | FeCl <sub>3</sub> ·6H <sub>2</sub> O + FeCl <sub>2</sub> ·4H <sub>2</sub> O<br>+ AlCl <sub>3</sub> ·6H <sub>2</sub> O (g) | Fe <sup>3+</sup> :Fe <sup>2+</sup> :Al <sup>3+</sup><br>(molar ratio) | Sample<br>No. |
|----------------------------------|---------------------------------------------|---------------------------------------------|---------------------------------------------|---------------------------------------------------------------------------------------------------------------------------|-----------------------------------------------------------------------|---------------|
| 0.5                              | 2.7967                                      | 1.3707                                      | 0.8327                                      |                                                                                                                           | 1.5:1:0.5                                                             | 1             |
|                                  | 2.0979                                      | 1.0282                                      | 1.8739                                      | 5.0                                                                                                                       | 1.5:1:1.5                                                             | 2             |
|                                  | 1.1991                                      | 0.5877                                      | 3.2132                                      |                                                                                                                           | 1.5:1:4.5                                                             | 3             |
|                                  | 5.5934                                      | 2.7413                                      | 1.6653                                      |                                                                                                                           | 1.5:1:0.5                                                             | 4             |
|                                  | 4.1959                                      | 2.0564                                      | 3.7477                                      | 10.0                                                                                                                      | 1.5:1:1.5                                                             | 5             |
|                                  | 2.3983                                      | 1.1754                                      | 6.4263                                      |                                                                                                                           | 1.5:1:4.5                                                             | 6             |
|                                  | 11.1868                                     | 5.4826                                      | 3.3306                                      |                                                                                                                           | 1.5:1:0.5                                                             | 7             |
|                                  | 8.3918                                      | 4.1128                                      | 7.4955                                      | 20.0                                                                                                                      | 1.5:1:1.5                                                             | 8             |
|                                  | 4.7965                                      | 2.3508                                      | 12.8527                                     |                                                                                                                           | 1.5:1:4.5                                                             | 9             |

Nine kinds of adsorbents (IAO/GO) with different composition ratio of raw materials were prepared in the preliminary experiments. The concentration of GO dispersion was used as 0.1g/100 mL H<sub>2</sub>O. Approximately 0.5 g of GO was added into 500 mL of deionized water and exfoliated by sonication for 2 h to obtain a uniform brown dispersion. The dispersion was centrifuged at 3000 rpm to remove the sediment. The supernatant was transferred into a 500 mL three-neck round bottom flask and then degassed with nitrogen gas for 30 min before use. The raw materials of FeCl<sub>3</sub>·6H<sub>2</sub>O, FeCl<sub>2</sub>·4H<sub>2</sub>O, and AlCl<sub>3</sub>·6H<sub>2</sub>O were sequentially added in the 500 mL GO solution. The molar ratio of Fe<sup>3+</sup>:Fe<sup>2+</sup> was fixed at 1.5:1 and the molar ratio of Fe<sup>3+</sup>:Al<sup>3+</sup> ranged as 3:1, 1:1 and 1:3. The mass ratio of raw materials (FeCl<sub>3</sub>·6H<sub>2</sub>O + FeCl<sub>2</sub>·4H<sub>2</sub>O + AlCl<sub>3</sub>·6H<sub>2</sub>O) and GO ranged as 10:1, 20:1 and 40:1. Among the nine adsorbents, Sample No. 3 had the highest capacity toward fluoride.
